# Supplementary material for: Construction of symbiotic one-dimensional ionic channels in a cobalt-based covalent organic framework for high-performance oxygen reduction electrocatalysis
Source: Royal Society of Chemistry journal article supplement (doi:10.1039/d2ta06228c), 2022-01-01
Supplement: d2ta06228c1.pdf [file d2ta06228c1.pdf]

## Supporting Information

### **Construction of Symbiotic One-Dimensional Ionic Channels in Cobalt-based Covalent Organic Framework for High-Performance Oxygen Reduction Electrocatalysis**

Rong Ren,<sup>a</sup> Liting Yang,<sup>b</sup> Zhang Lin,<sup>a</sup> Xiaoyu Li,<sup>a</sup> Shuomeng Zhang,<sup>a</sup> Tianlong Zheng,<sup>a</sup>  
Duojie Wu,<sup>c</sup> Jian Wang,<sup>d</sup> Zidong Wei,<sup>\*d</sup> Wei Ding,<sup>d</sup> Ning Huang,<sup>b\*</sup> Meng Gu<sup>c</sup> and  
Qinggang He<sup>\*ac</sup>

- a. College of Chemical and Biological Engineering, Zhejiang University, Hangzhou, Zhejiang 310027, China.
- b. MOE Key Laboratory of Macromolecular Synthesis and Functionalization, State Key Laboratory of Silicon Materials, Department of Polymer Science and Engineering, Zhejiang University, Hangzhou 310027, China.
- c. Department of Materials Science and Engineering, Southern University of Science and Technology, Shenzhen 518055, China.
- d. The State Key Laboratory of Power Transmission Equipment & System Security and New Technology, Chongqing Key Laboratory of Chemical Process for Clean Energy and Resource Utilization, School of Chemistry and Chemical Engineering, Chongqing University, Chongqing 400044, China.
- e. Ningbo Research Institute, Zhejiang University, Ningbo, Zhejiang 315100, China

\* Corresponding author. E-mail: [qghe@zju.edu.cn](mailto:qghe@zju.edu.cn) (Q.H.); [nhuang@zju.edu.cn](mailto:nhuang@zju.edu.cn) (N. H.); [zdwei@cqu.edu.cn](mailto:zdwei@cqu.edu.cn) (Z. W.)

## Materials

Acetic acid,  $\text{Co}(\text{CH}_3\text{COO})_2 \cdot 4\text{H}_2\text{O}$ , trimethylamine,  $\text{K}_2\text{CO}_3$ , dichlorobenzene, ethanol, isopropanol, and N,N-dimethylformamide (DMF) were purchased from Sinopharm Chemical Reagent Co. Ltd. and used as received. 4-Nitrobenzaldehyde, pyrrole, 2,5-dihydroxyterephthalaldehyde, 2,5-dimethoxyterephthalaldehyde and 1,3-diiiodopropane were purchased from Energy Chemical. Tetraphenylaminoporphyrin cobalt and 3-iodo-trimethylpropylammonium iodide were synthesized according to the literature.<sup>1</sup> Argon gas and oxygen gas (99.99%) were purchased from Jingong Special Gas Factory Co., Ltd. Deionized water with a conductivity of  $18 \text{ M}\Omega \cdot \text{cm}$  was produced by an SMART ultrapure water system.

## Structure and compositional characterization

The molecular structure was identified by  $^1\text{H}$  NMR (Mercury Plus 400 NMR spectrometer, Varian) and FTIR (Thermo Fisher Scientific IS5). Transmission electron microscopy (TEM) and high-resolution TEM images were obtained using a Tecnai G2 F30 ST microscope and a Tecnai G2 20 S-twin microscope, respectively. Nitrogen physisorption isotherms were collected on a Belsorp Max II instrument at 77 K. Powder X-ray diffraction (PXRD) measurements were performed on a BRUKER D8-Advance X-ray diffraction system equipped with a Cu sealed tube ( $\lambda = 1.54178 \text{ \AA}$ ). XPS measurements were performed on a Thermo Scientific K-Alpha+ instrument with an Al  $\text{K}\alpha$  source at 150 W. The powders of the samples were dispersed in ethanol solution and deposited onto silicon wafers. Analysis and quantification of the obtained data were performed using Avantage software. All the binding energies derived from the XPS spectra were calibrated to C 1s at 284.45 eV. Inductively coupled plasma–mass spectrometry (ICP–MS) analysis was performed on an Agilent 720ES instrument to determine the content of Co. The element analysis was performed with a Flash EA 1112 element analyzer (Thermo Finnigan). XAS spectra at the Co K-edge were recorded at room temperature in transmission mode at the BL14W1 beamline of the Shanghai Synchrotron Radiation Facility (SSRF). The energy of the Co K-edge was calibrated

by pure Co foil. All the acquired XAS data were analyzed and processed by the IFEFFIT software packages according to the standard procedures.

### Calculation of electrochemical parameters

Electrochemical impedance spectroscopy (EIS) measurements were carried out in 0.1 M KOH at OCP in the frequency range from 100 kHz to 1 Hz.

Identifying the catalytic kinetics of ORR catalysts is of great significance for the recognition of and improvement in catalytic performance. The Tafel plots were obtained through the polarization curves, and the ORR Tafel slope was fitted and calculated according to the Tafel Equation (1):

$$\eta = a + b \cdot \log |j_k| \quad (1)$$

where  $\eta$  is the overpotential,  $j_k$  is the kinetic current density,  $a$  is a constant, representing the overpotential at a current density of 1 A/cm<sup>2</sup> and  $b$  is the Tafel slope.

After polarization curve measurements were performed at different electrode rotating speeds, the number of electrons transferred ( $n$ ) per oxygen molecule and kinetic current density ( $j_k$ ) were calculated by the Koutecky–Levich (K–L) Equation (2):

$$\frac{1}{j} = \frac{1}{j_k} + \frac{1}{j_d} = \frac{1}{j_k} + \frac{1}{0.62nFD_{O_2}^{2/3}v^{-1/6}C_{O_2}\omega^{1/2}} \quad (2)$$

In the K–L equation,  $j$ ,  $j_d$ , and  $j_k$  are the measured current density, limiting current density, and kinetic current density, respectively;  $\omega$  is the rotation speed in rpm, and  $n$  is the number of electrons transferred per oxygen molecule.  $F$  is the Faraday constant (96,485 C mol<sup>-1</sup>),  $C_0$  is the bulk concentration of O<sub>2</sub> (1.2 × 10<sup>-6</sup> mol cm<sup>-3</sup>),  $D_0$  is the diffusion coefficient of O<sub>2</sub> in 0.1 M KOH solution (1.9 × 10<sup>-5</sup> cm<sup>2</sup> s<sup>-1</sup>), and  $\nu$  is the kinematic viscosity (0.01 cm<sup>2</sup> s<sup>-1</sup>).

The turnover frequency (TOF, number of electrons per Co active site and per second) was calculated according to Equation (3):

$$TOF = \frac{j_k}{\frac{W_{Co}}{M_{Co}} \times N_A \times m_{loading}} = 1.224 \times \frac{|j_k|}{|W_{Co}|} (e^- \cdot site^{-1} \cdot s^{-1}) \quad (3)$$

where  $W_{Co}$  and  $M_{Co}$  ( $|M_{Co}|=58.93 \text{ g mol}^{-1}$ ) are the mass fraction and molar weight of Co, respectively.  $m$  is catalyst loading on the RDE.  $W_{Co}$  is measured from ICP-MS analysis.  $j_k$  is the kinetic current density.  $N_A$  is Avogadro's number ( $6.02 \times 10^{23} \text{ mol}^{-1}$ ).

RRDE tests were performed and the  $H_2O_2$  yield was evaluated using equation (4):

$$H_2O_2 \text{ yield}(\%) = 2 \times \frac{\frac{i_r}{N_C}}{i_d + \frac{i_r}{N_C}} \quad (4)$$

where  $i_r$  is ring current,  $i_d$  is disk current, and  $N_C$  is the collection efficiency of the RRDE, defined as the fraction of the peroxide product from the disk to the ring.

### Preparation of catalyst-coated GDE for fuel cell testing

To prepare the electrocatalyst ink, 80 mg of carbon black ECP-600 and 40 mg of cobalt-based composite catalyst (TAPPCo-OMe and TAPPCo-QA were used for different electrode manufacturing) were weighed and placed in a 50 mL centrifuge tube. Subsequently, water/isopropanol (2 mL/18 mL) was slowly added to the tube, and a shearing dispersion procedure was carried out by a high-shear dispersion emulsifier. Thirty milligrams of polyfluorene ionomer was added to the mixed solution with catalysts and ultrasonicated for 1 h to form a uniform ink mixture. The mixture was sprayed onto Toray carbon paper ( $4 \text{ cm}^2$ , TGP-H-60) using a spray gun connected to the nitrogen line to obtain a COF catalyst loading of  $3 \text{ mg/cm}^2$ . The PtRu/C anode was prepared in a similar manner and reached a metal loading of  $1 \text{ mg/cm}^2$ .

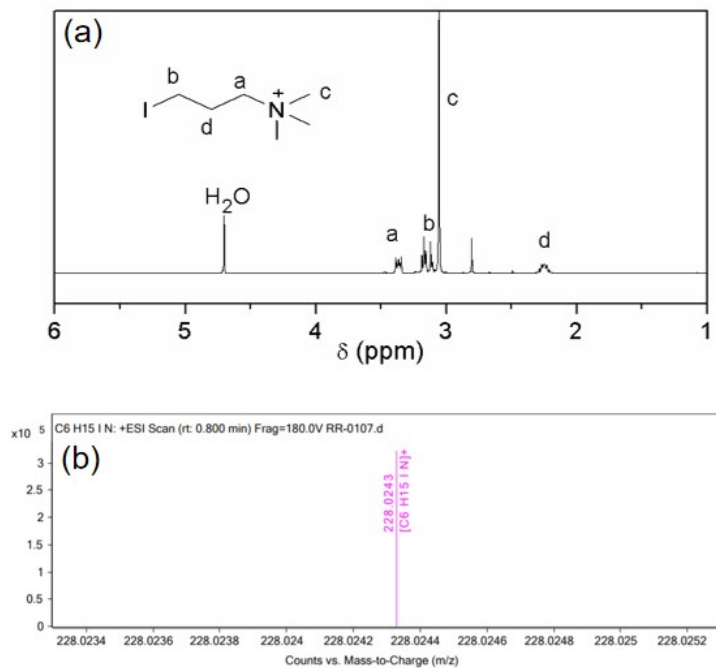

**Fig. S1** <sup>1</sup>H NMR and mass spectra of ITMPA.

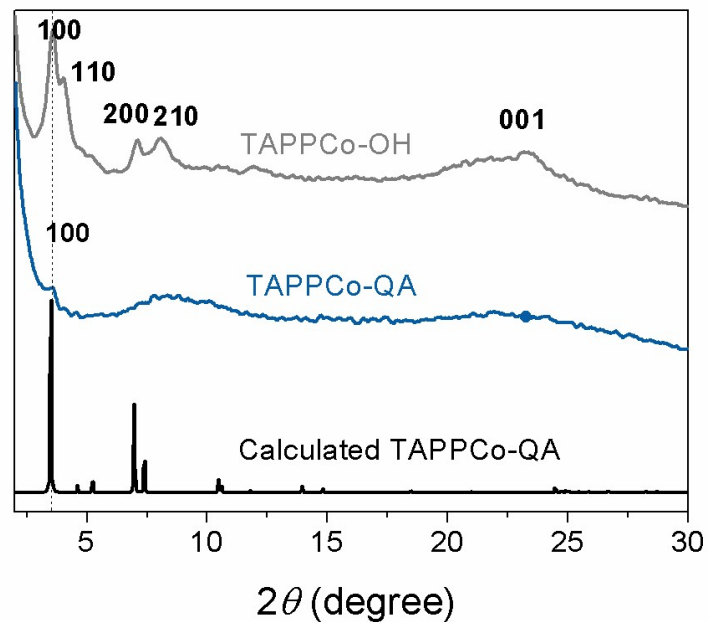

**Fig. S2** Experimental and calculated PXRD patterns of TAPPCo-OH and TAPPCo-QA.

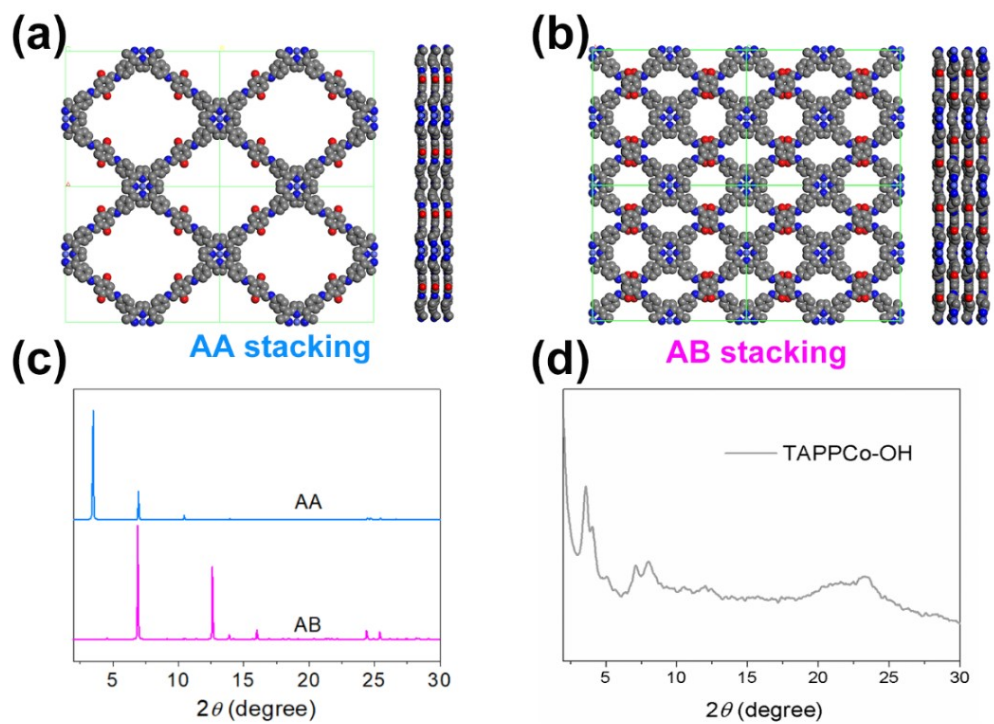

**Fig. S3** Theoretical unit-cell structure of the slipped AA-stacking mode (a) and staggered AB-stacking mode (b) of the TAPPCo-OH COF. Calculated PXRD pattern (c) from the proposed models and experimental PXRD pattern (d) of the TAPPCo-OH COF

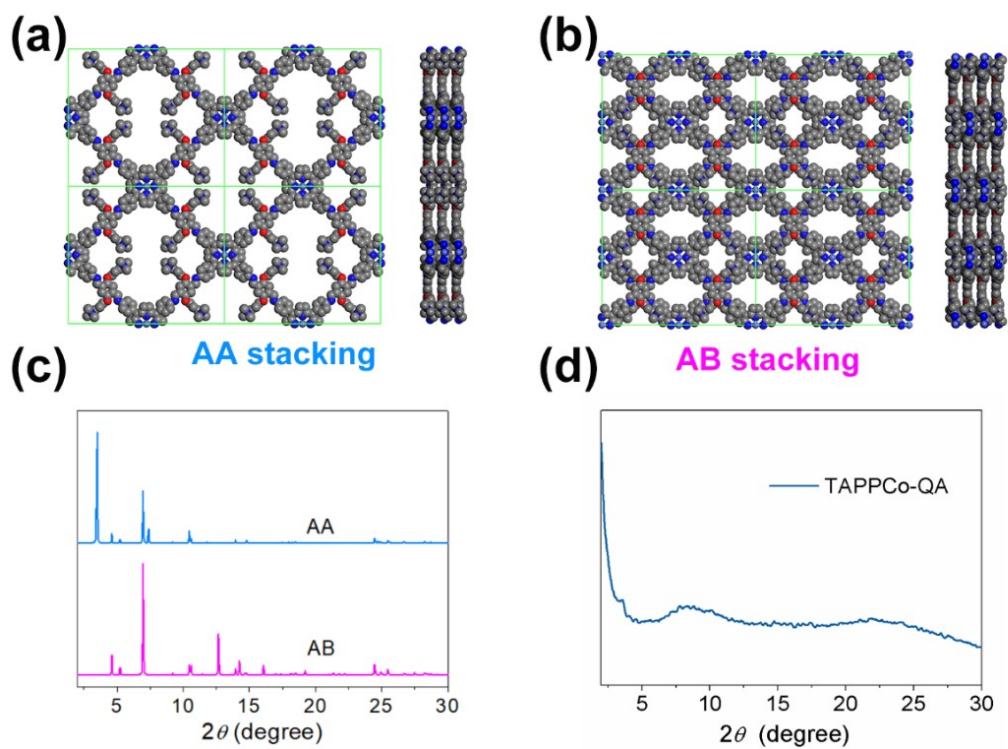

**Fig. S4** Theoretical unit-cell structure of the slipped AA-stacking mode (a) and staggered AB-stacking mode (b) of the TAPPCo-QA COF, the calculated PXRD pattern (c) from the proposed models and the experimental PXRD pattern (d) of the TAPPCo-QA COF.

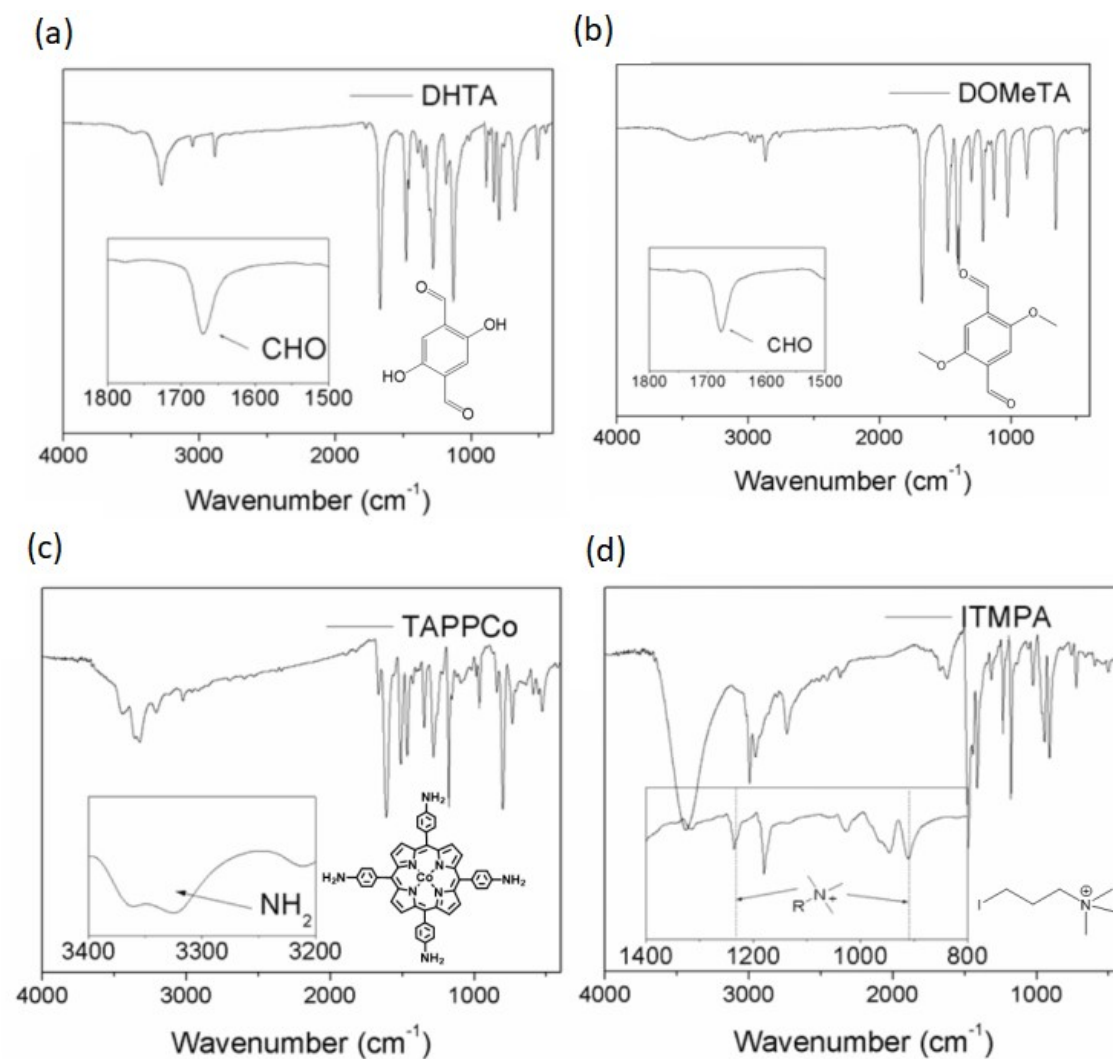

**Fig. S5** FTIR spectra of DHTA, DOMeTA, TAPPCo and ITMPA



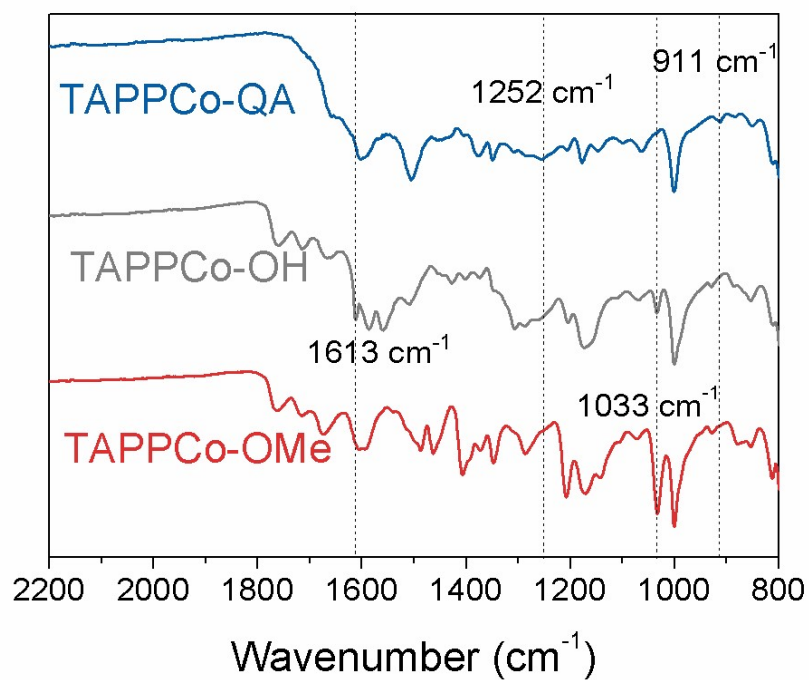

**Fig. S6** FTIR spectra of TAPPCo-QA, TAPPCo-OH and TAPPCo-OMe.

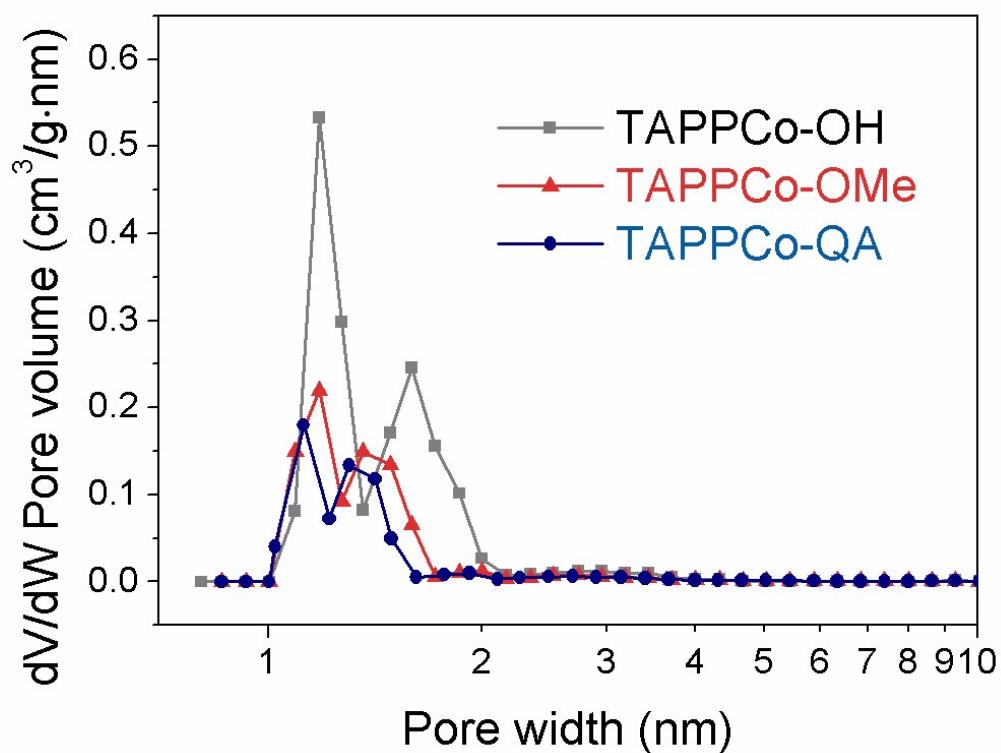

**Fig. S7** Pore size distributions of the TAPPCo-OH COF, TAPPCo-OMe COF and TAPPCo-QA COF.

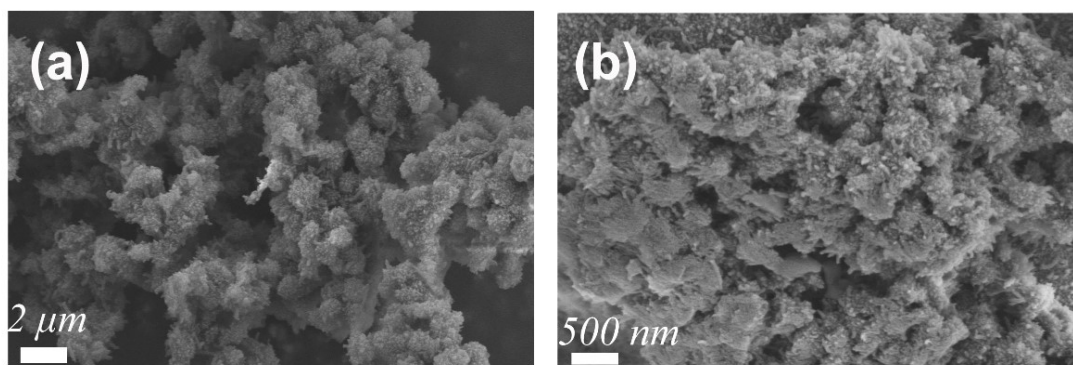

**Fig. S8** SEM images of the TAPPCo-OH COF

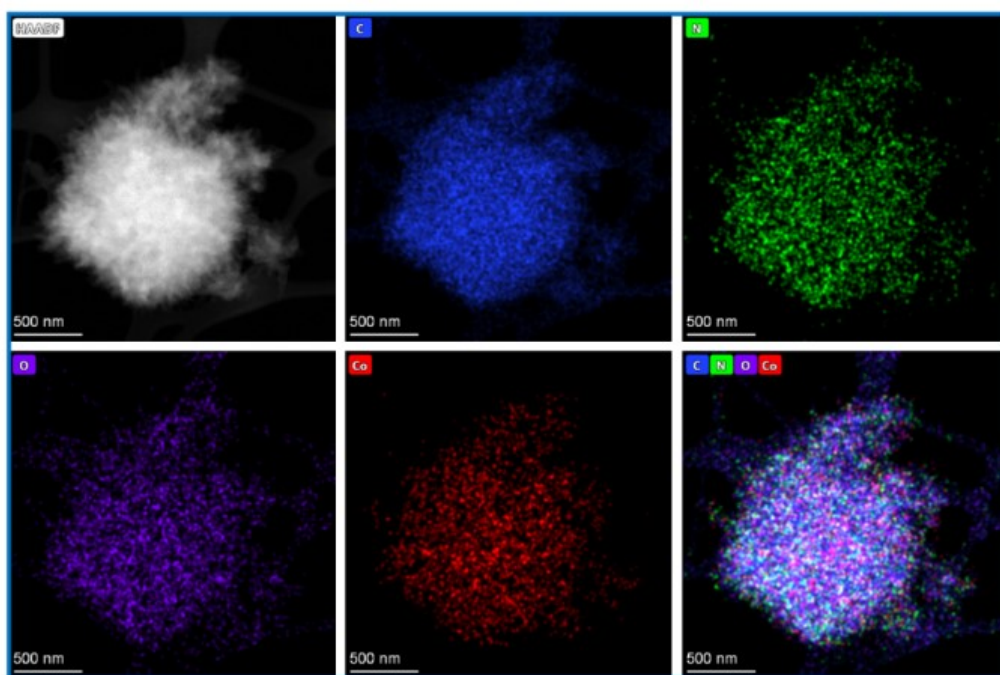

**Fig. S9** The EDS elemental mapping of TAPPCo-QA

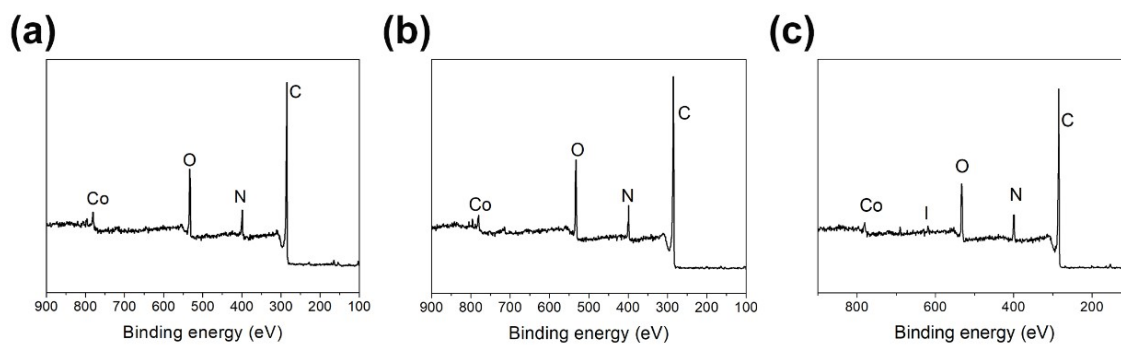

**Fig. S10** XPS survey spectra of (a) TAPPCo-OH COF, (b) TAPPCo-OMe COF, and (c) TAPPCo-QA COF

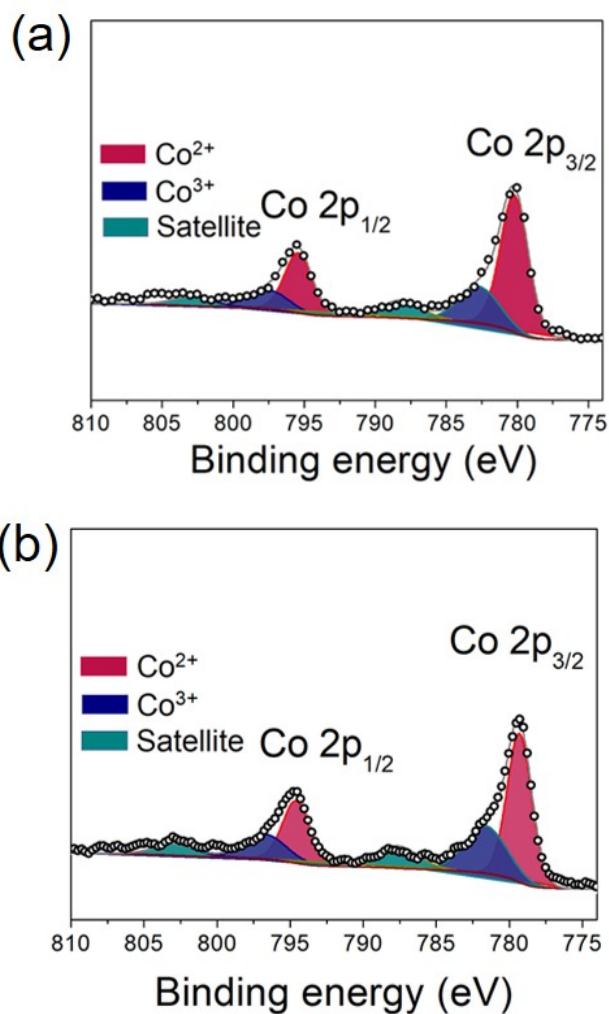

**Fig. S11** High-resolution Co 2p XPS spectra of the (a) TAPPCo-OMe COF and (b) TAPPCo-OH COF

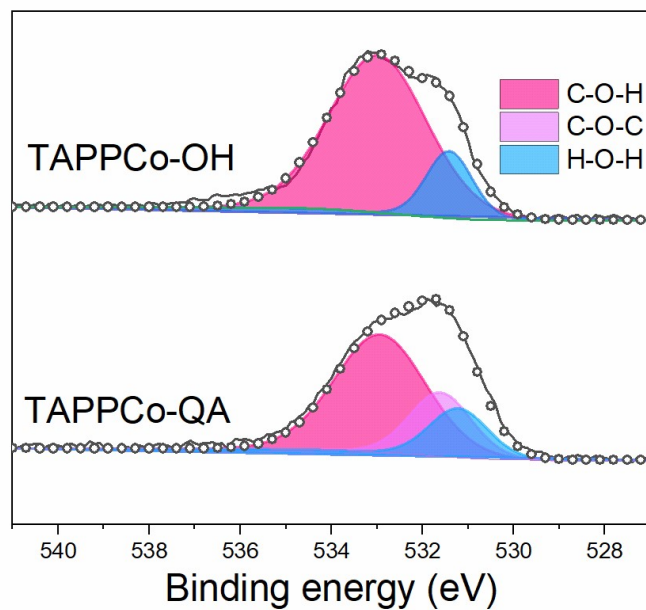

**Fig. S12** High-resolution O 1s XPS spectra of TAPPCo-OH and TAPPCo-QA

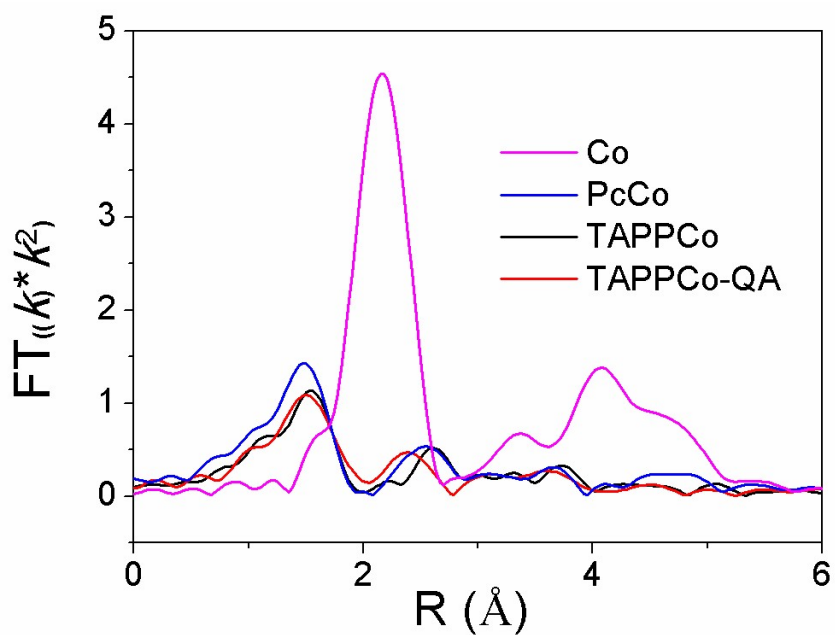

**Fig. S13** Experimental Fourier transform of the Co K-edge data of Co, CoPc, TAPPCo and TAPPCo-QA.

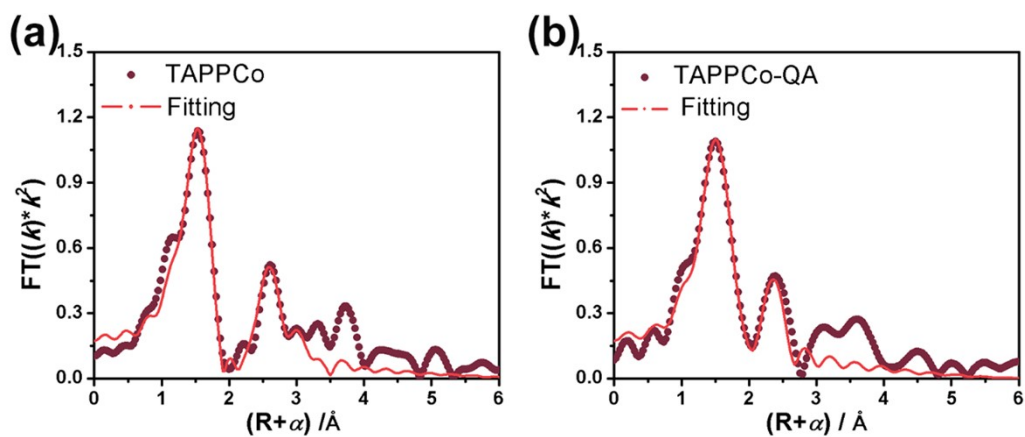

**Fig. S14** Experimental and fitted Fourier transform of the Co K-edge data of (a) TAPPCo and (b) the TAPPCo-QA COF.

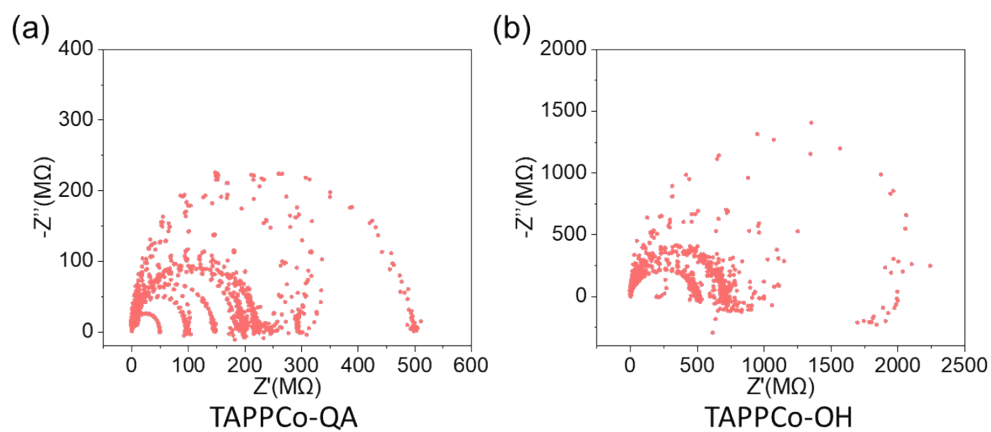

**Fig. S15** Nyquist impedance plots of (a) TAPPCo-QA and (b) TAPPCo-OH. All AFM-EIS measurements were conducted at 25 °C with a relative humidity of 65%. Direct current (dc) bias: 2 V; amplitude of the alternating current (ac) excitation signal: 100 mV; and frequency range: 100 kHz~1 Hz.

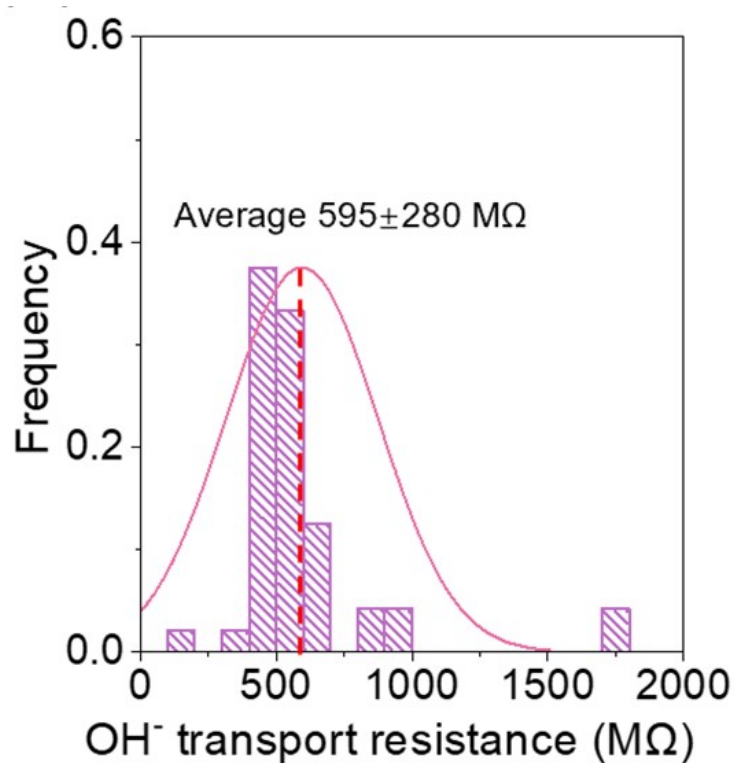

**Fig. S16** Histogram of the local ion transport resistances of TAPPCo-OH.

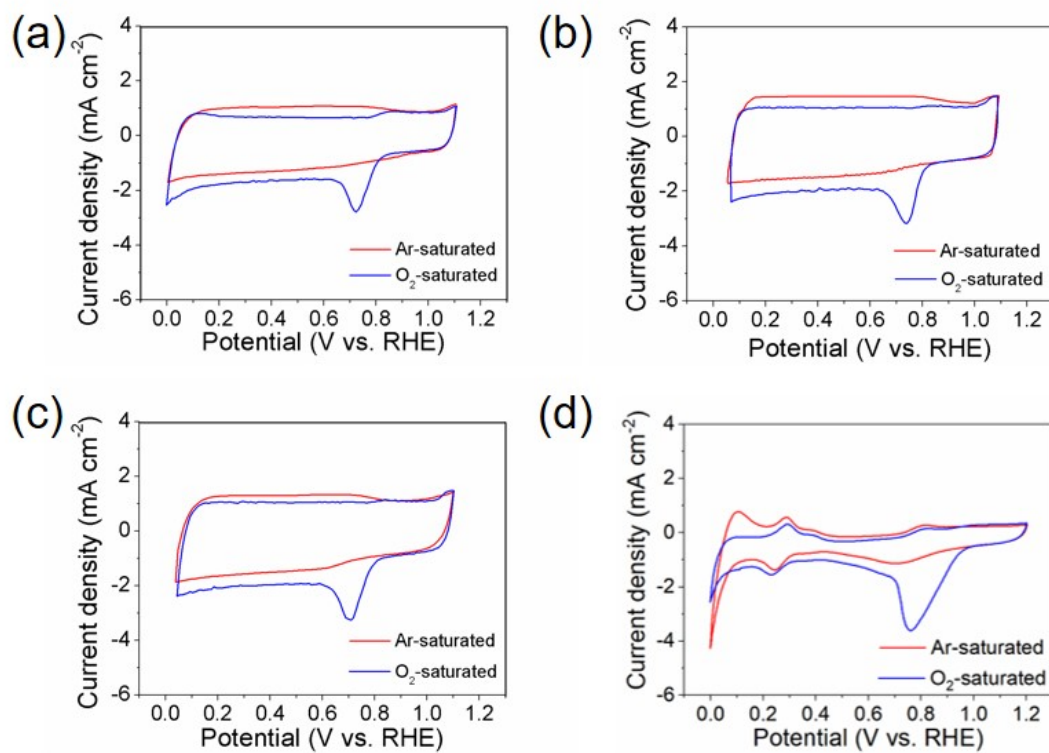

**Fig. S17** CV curves of the (a) TAPPCo-OH COF, (b) TAPPCo-QA COF, (c) TAPPCo-OMe COF, (d) Pt/C in Ar-saturated and  $\text{O}_2$ -saturated 0.1 M KOH solution

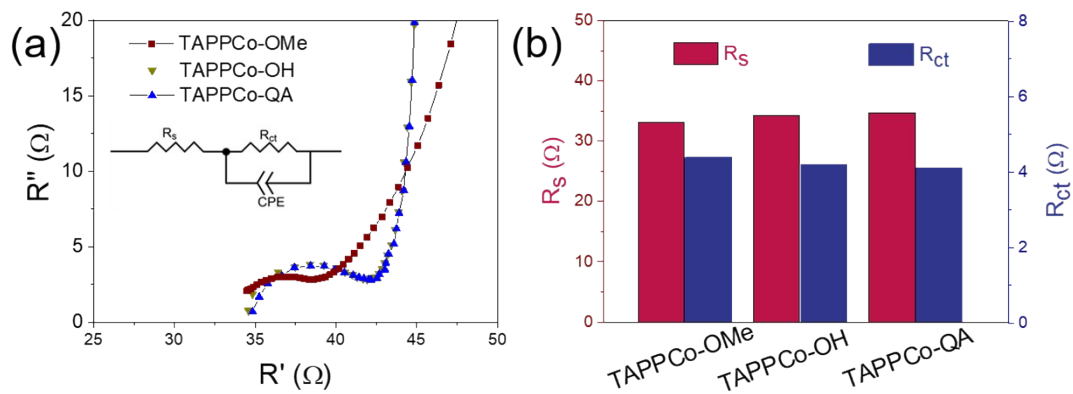

**Fig. S18** (a) EIS curves of TAPPCo-OH, TAPPCo-QA and TAPPCo-OMe , (b)  $R_s$  and  $R_{ct}$  of TAPPCo-OH, TAPPCo-QA and TAPPCo-OMe

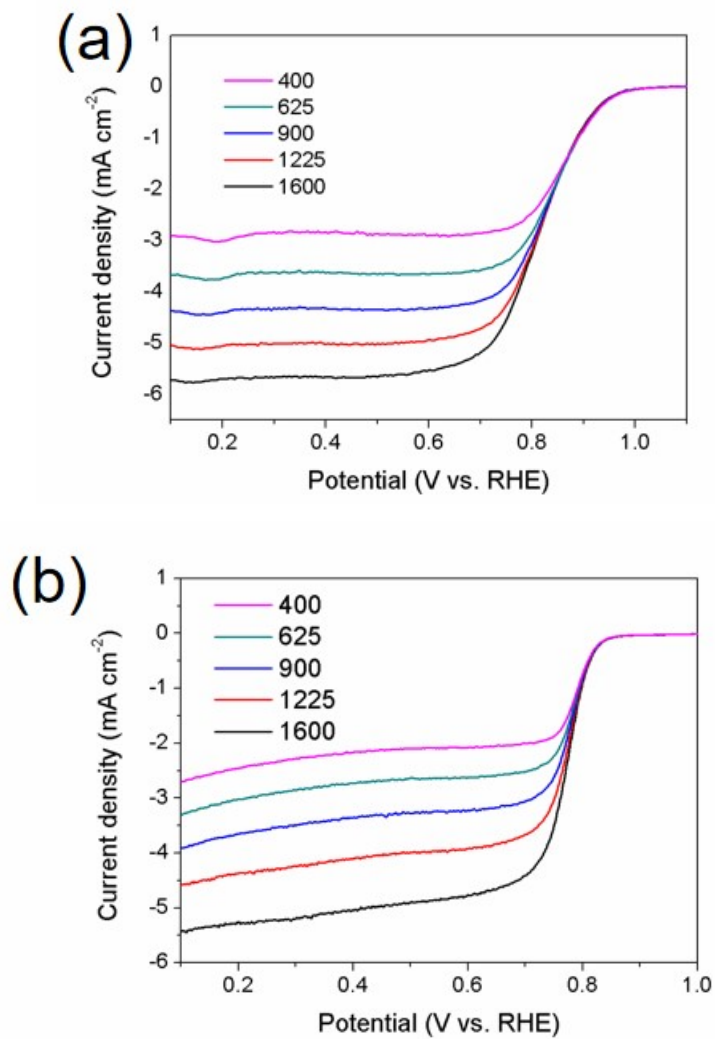

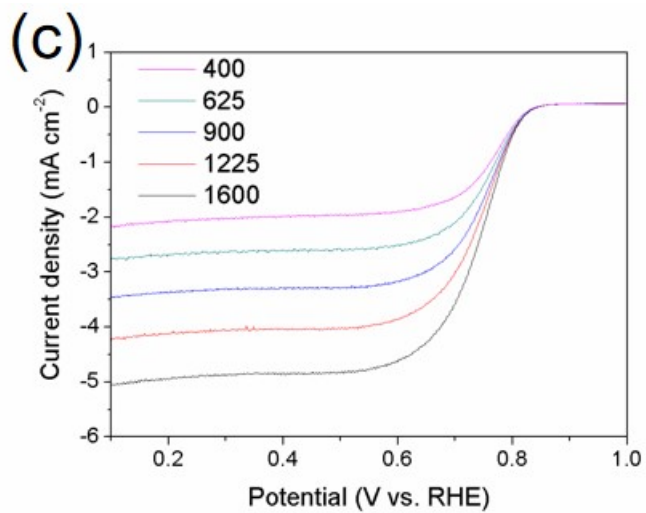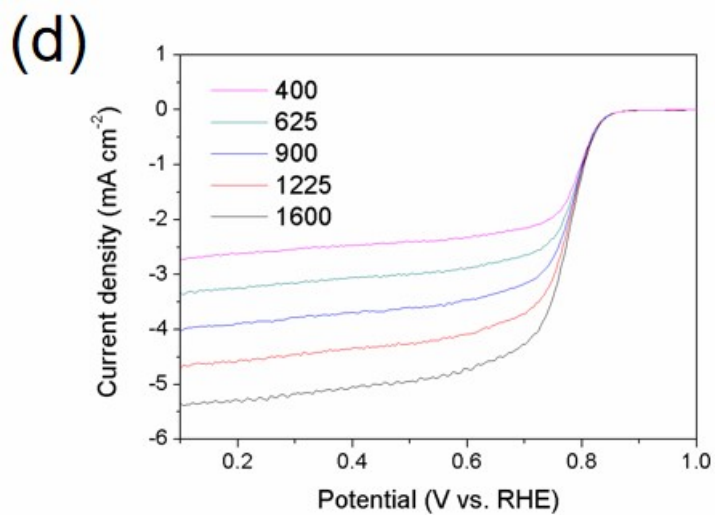

**Fig. S19** ORR polarization curves of (a) Pt/C, (b) TAPPCo-QA, (c) TAPPCo-OMe and (d) TAPPCo-OH at different rotating speeds in a 0.1 M O<sub>2</sub>-saturated KOH solution at a scan rate of 10 mV s<sup>-1</sup>



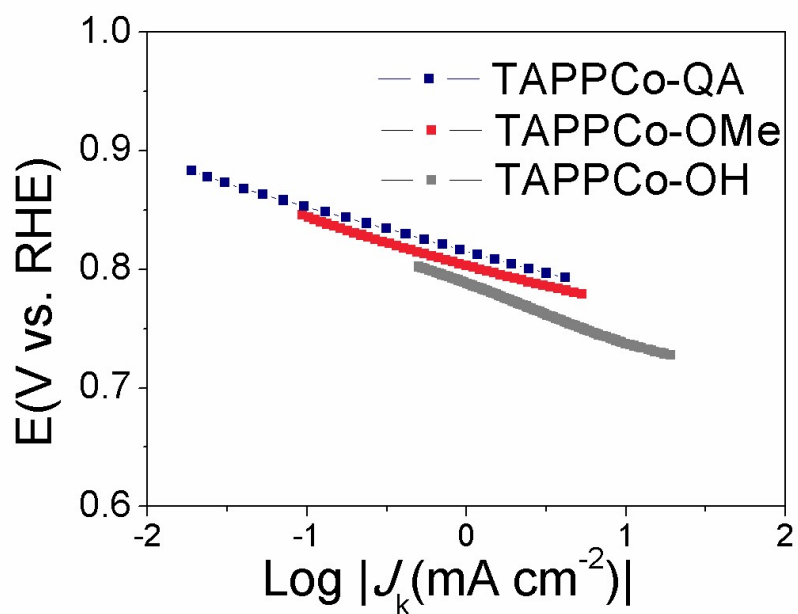

**Fig. S20** Tafel curves of different catalysts at a rotating speed of 1600 rpm in a 0.1 M  $O_2$ -saturated KOH solution

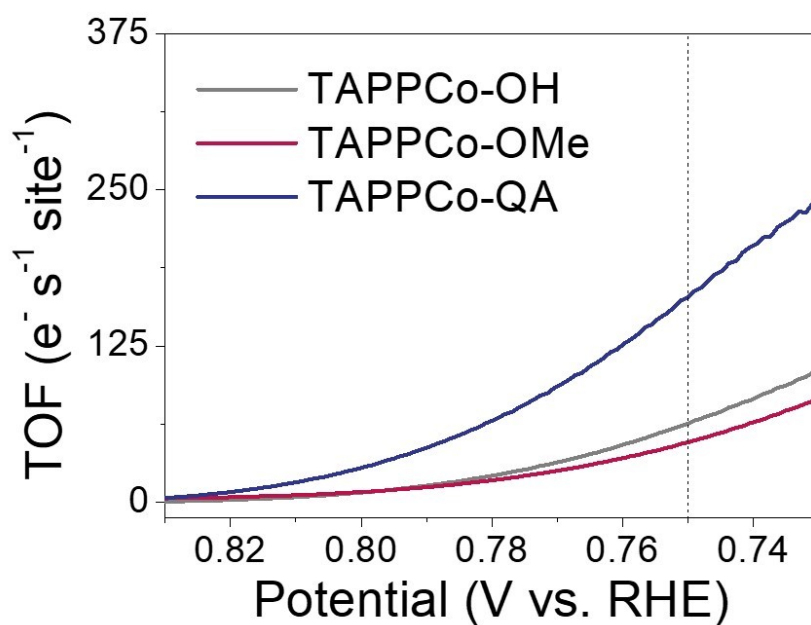

**Fig. S21** TOF of the Co site in TAPPCo-OH, TAPPCo-OMe and TAPPCo-QA

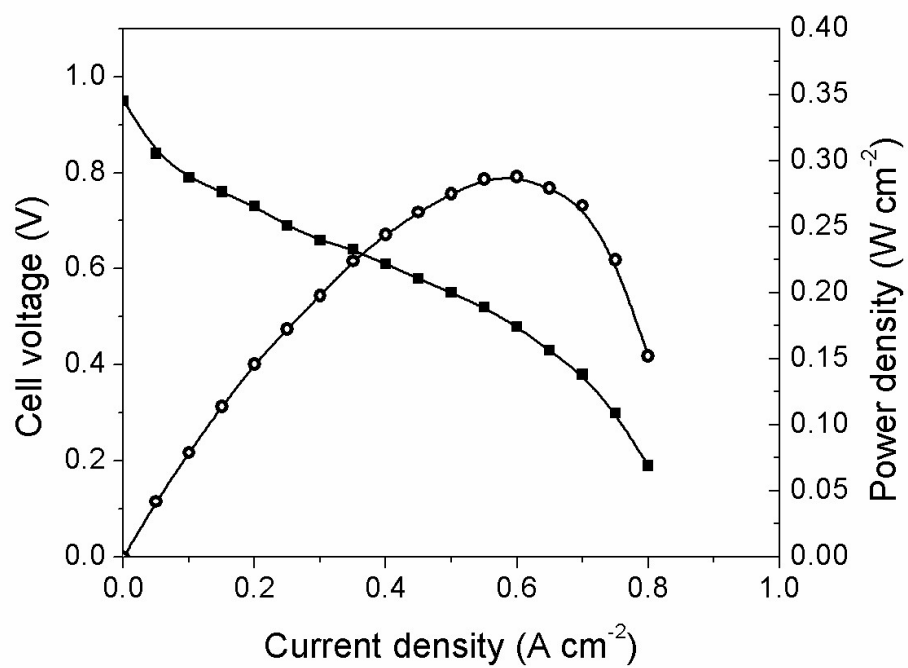

**Fig. S22** AEMFC performance of the Pt/C (The loading of anodic PtRu/C catalyst is  $1 \text{ mg}_{\text{metal}} \text{ cm}^{-2}$ ; the loading of cathodic Pt/C catalyst is  $1 \text{ mg}_{\text{Pt}} \text{ cm}^{-2}$ ; Membrane: FAA-50; Temperature:  $60^\circ\text{C}$ ; RH=75%;  $500 \text{ mL min}^{-1}$ ,  $\text{H}_2/\text{O}_2$ )

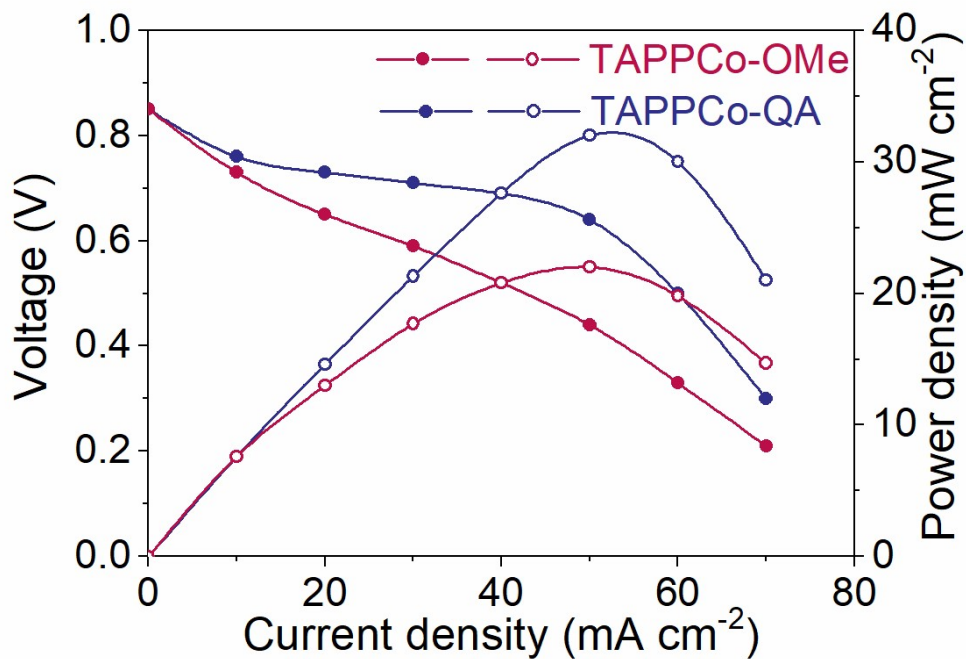

**Fig. S23** AEMFC performance of the TAPPCo-OMe and TAPPCo-QA without ionomer in the cathode catalyst layer (The loading of anodic PtRu/C catalyst is 1 mg<sub>metal</sub> cm<sup>-2</sup>; The loading of cathodic TAPPCo-OMe/TAPPCo-QA catalysts is 3 mg cm<sup>-2</sup>; Membrane: FAA-50; Temperature:60°C; RH=75%; 500 mL min<sup>-1</sup>, H<sub>2</sub>/O<sub>2</sub>)

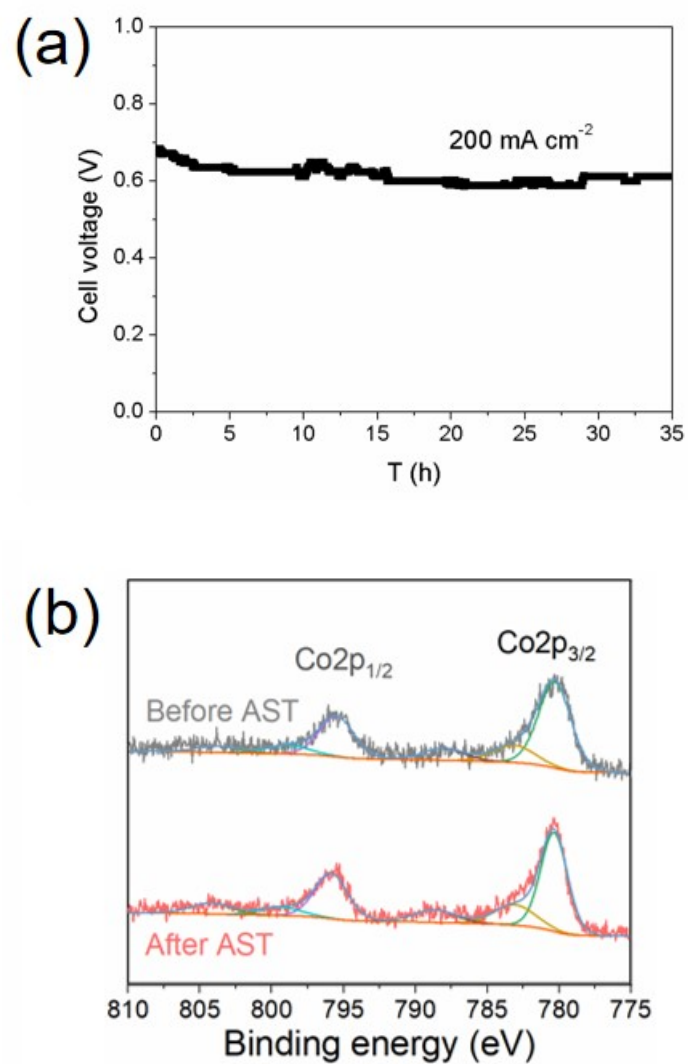

**Fig. S24** (a) MEA stability test of TAPPCo-QA (The loading of anodic PtRu/C catalyst is 1 mg<sub>metal</sub> cm<sup>-2</sup>; The loading of cathodic TAPPCo-QA catalyst is 3 mg cm<sup>-2</sup>; Membrane: FAA-50; Temperature: 60°C; RH=75% ; 500 mL min<sup>-1</sup>, H<sub>2</sub>/O<sub>2</sub>); (b) Co 2p XPS spectra of the TAPPCo-QA COF before and after MEA stability measurements

**Table S1.** N and Co species ratios of TAPPCo-based COFs fitted from the high-resolution XPS N 1s and Co 3p spectra.

| COFs       | N        |          | N     |            | Co        |                  | Co               |  |
|------------|----------|----------|-------|------------|-----------|------------------|------------------|--|
|            | Content* | Pyrrolic | Imine | Quaternary | Content** | Co <sup>2+</sup> | Co <sup>3+</sup> |  |
| TAPPCo-OH  | 9.5%     | 45%      | 55%   | --         | 5.5%      | 76%              | 24%              |  |
| TAPPCo-OMe | 9.3%     | 48%      | 52%   | --         | 5.2%      | 79%              | 21%              |  |
| TAPPCo-QA  | 8.9%     | 41%      | 43%   | 16%        | 4.8%      | 83%              | 17%              |  |

\* The N content was obtained by the elemental analysis test.

\*\* The Co content was obtained by the ICP test.

**Table S2.** K-edge absorption edge energy of Co, CoPc, TAPPCo and TAPPCo-QA

| sample                       | Co   | CoPc   | TAPPCo | TAPPCo-QA |
|------------------------------|------|--------|--------|-----------|
| K-edge absorption energy(eV) | 7709 | 7715.5 | 7713.5 | 7720.5    |

\*The K-edge absorption energy (eV) takes the first maximum value of the derivative of the curve.

**Table S3.** EXAFS fitting results at the Co K-edge for TAPPCo and the TAPPCo-QA COF ( $S_0^2=0.72$ ).

| Sample | Path              | CN            | R / Å           | $\sigma^2 / \text{Å}^2$ | $\Delta E_0 / \text{eV}$ | R-factor |
|--------|-------------------|---------------|-----------------|-------------------------|--------------------------|----------|
| TAPPCo | Co-N              | 4.0(fixed)    | $1.95 \pm 0.01$ | $0.002 \pm 0.001$       | $8.0 \pm 1.6$            | 0.020    |
|        | Co-C <sub>1</sub> | 8.0(fixed)    | $2.98 \pm 0.01$ | $0.003 \pm 0.002$       |                          |          |
| TAPPCo | Co-N              | $4.0 \pm 0.8$ | $1.99 \pm 0.02$ | $0.005 \pm 0.003$       | $2.4 \pm 2.3$            | 0.020    |
| -QA    | Co-C              | $8.0 \pm 1.2$ | $3.00 \pm 0.10$ | $0.020 \pm 0.010$       |                          |          |

<sup>a</sup> CN, the coordination number; R, the interatomic distance;  $\sigma^2$ , Debye-Waller factors;  $\Delta E_0$ , the inner potential correction; R-factor: the goodness of fitting. These factor values were fixed based on the known structure of TAPPCo during EXAFS fitting.

**Table S4.** Numerical equivalent circuit fitting results of the local electrochemical impedance spectrum obtained from 50 randomly selected points on TAPPCo-QA.

| Position | $R_1 (\Omega)$ | $CPE_1-T$<br>( $F\text{ cm}^{-2}s^{n-1}$ ) | $CPE_1-P$<br>(n1) | $R_2(\Omega)$ | $CPE_2-T$<br>( $F\text{ cm}^{-2}s^{n-1}$ ) | $CPE_2-P$<br>(n2) |
|----------|----------------|--------------------------------------------|-------------------|---------------|--------------------------------------------|-------------------|
| 1        | 20.1           | 1.597E-08                                  | 0.257             | 76.89         | 1.601E-07                                  | 0.658             |
| 2        | 0.8697         | 2.2437E-07                                 | 0.632             | 48.32         | 4.8738E-08                                 | 0.548             |
| 3        | 2.006          | 1.2555E-06                                 | 0.97052           | 194.2         | 3.0664E-07                                 | 0.543             |
| 4        | 92.12          | 2.5033E-06                                 | 0.9637            | 131.7         | 6.5808E-07                                 | 0.807             |
| 5        | 117.3          | 6.0368E-08                                 | 0.435             | 174.3         | 2.0427E-06                                 | 0.95346           |
| 6        | 2.822          | 1.2446E-06                                 | 0.97              | 193.3         | 4.0249E-07                                 | 0.489             |
| 7        | 2.879          | 1.2356E-06                                 | 0.96984           | 194.3         | 3.0002E-07                                 | 0.506             |
| 8        | 45.26          | 1.0054E-07                                 | 0.894             | 170.5         | 4.8762E-08                                 | 0.733             |
| 9        | 48.36          | 2.6654E-07                                 | 0.726             | 167.8         | 4.8418E-08                                 | 0.536             |
| 10       | 149.8          | 9.3662E-08                                 | 0.859             | 96.82         | 5.3173E-09                                 | 0.394             |
| 11       | 98.78          | 2.9991E-09                                 | 0.442             | 151.3         | 7.0127E-08                                 | 0.777             |
| 12       | 0.27052        | 3.0107E-08                                 | 0.446             | 48.94         | 3.3156E-07                                 | 0.528             |
| 13       | 4.991          | 1.3078E-06                                 | 0.96982           | 189.9         | 4.3789E-07                                 | 0.427             |
| 14       | 21.5           | 1.6174E-08                                 | 0.76              | 75.79         | 1.2826E-07                                 | 0.874             |
| 15       | 1.083          | 2.1623E-07                                 | 0.527             | 95.01         | 1.54E-08                                   | 0.42              |
| 16       | 8.176          | 9.4175E-08                                 | 0.709             | 186.7         | 3.2289E-07                                 | 0.872             |
| 17       | 29.97          | 2.8058E-07                                 | 1                 | 166.9         | 1.9912E-08                                 | 0.462             |
| 18       | 87.55          | 4.2606E-07                                 | 0.99431           | 404.1         | 6.544E-06                                  | 1                 |
| 19       | 23             | 4.6107E-07                                 | 0.98752           | 468.6         | 4.6147E-07                                 | 0.889             |
| 20       | 2.54           | 2.197E-07                                  | 1                 | 94.53         | 3.7728E-07                                 | 0.716             |
| 21       | 31.25          | 3.0174E-07                                 | 0.99478           | 165.1         | 2.7683E-08                                 | 0.432             |
| 22       | 2.263          | 2.3039E-07                                 | 1                 | 194.1         | 3.1476E-07                                 | 0.643             |
| 23       | 73.71          | 3.2097E-08                                 | 0.453             | 146           | 2.0665E-06                                 | 0.94929           |
| 24       | 74.31          | 2.9666E-08                                 | 0.462             | 147.1         | 1.9911E-06                                 | 0.95179           |
| 25       | 74.04          | 2.9495E-08                                 | 0.463             | 147.3         | 1.9962E-06                                 | 0.95158           |

|    |       |            |         |       |            |         |
|----|-------|------------|---------|-------|------------|---------|
| 26 | 76.58 | 7.7486E-08 | 0.332   | 226.2 | 2.3513E-06 | 0.94335 |
| 27 | 61.68 | 1.9009E-06 | 0.9907  | 164.1 | 7.7264E-07 | 0.99567 |
| 28 | 88.23 | 2.3663E-06 | 0.96393 | 135.3 | 6.667E-07  | 1       |
| 29 | 92.33 | 2.4601E-06 | 0.96599 | 131.7 | 6.5864E-07 | 1       |
| 30 | 108.4 | 8.1332E-08 | 0.391   | 185   | 2.4617E-06 | 0.93618 |
| 31 | 114.9 | 6.2167E-08 | 0.429   | 176.8 | 2.068E-06  | 0.95265 |
| 32 | 121   | 5.7742E-08 | 0.443   | 170.9 | 2.0088E-06 | 0.95444 |
| 33 | 111   | 6.4805E-08 | 0.422   | 181.4 | 2.0893E-06 | 0.95217 |
| 34 | 1.481 | 2.3926E-06 | 0.95485 | 144.6 | 3.3984E-06 | 1       |
| 35 | 1.655 | 2.2885E-06 | 0.95763 | 144.4 | 3.3195E-06 | 0.781   |
| 36 | 1.722 | 2.2519E-06 | 0.95876 | 144.4 | 3.4281E-06 | 0.876   |
| 37 | 1.548 | 2.2781E-06 | 0.9568  | 144.5 | 3.0344E-06 | 0.793   |
| 38 | 1.698 | 2.2734E-06 | 0.95729 | 144.4 | 3.2543E-06 | 0.582   |
| 39 | 9.426 | 4.6416E-07 | 0.98989 | 177.7 | 1.3855E-07 | 0.768   |
| 40 | 9.297 | 4.7276E-07 | 0.98788 | 177.7 | 1.3689E-07 | 0.572   |
| 41 | 8.94  | 4.6735E-07 | 0.98845 | 178.6 | 1.3266E-07 | 0.675   |
| 42 | 10.16 | 3.1355E-06 | 0.98937 | 211.5 | 2.44E-07   | 0.806   |
| 43 | 10.14 | 3.1571E-06 | 0.98848 | 211.7 | 2.3928E-07 | 0.707   |
| 44 | 9.976 | 3.2293E-06 | 0.98564 | 211.9 | 1.5967E-07 | 0.643   |
| 45 | 10.19 | 3.166E-06  | 0.98808 | 211.5 | 2.9411E-07 | 0.784   |
| 46 | 41.58 | 1.3201E-07 | 0.311   | 154.7 | 5.9169E-06 | 0.90807 |
| 47 | 41.79 | 1.3034E-07 | 0.312   | 154.3 | 5.9262E-06 | 0.90776 |
| 48 | 41.57 | 1.2904E-07 | 0.313   | 154.6 | 5.8844E-06 | 0.90827 |
| 49 | 41.46 | 1.2794E-07 | 0.313   | 154.9 | 5.8864E-06 | 0.90817 |
| 50 | 41.89 | 1.2882E-07 | 0.313   | 154.6 | 5.8723E-06 | 0.90829 |

\* The equivalent circuit fitting process was conducted by using ZView software to obtain the local charge transfer resistances of TAPPCo-QA. All AFM-EIS measurements were conducted at 25 °C with a relative humidity of 65%. Direct current (dc) bias: 2 V; amplitude of the alternating current (ac) excitation signal: 100 mV; and frequency range: 100 kHz~1 Hz.

**Table S5.** Numerical equivalent circuit fitting results of the local electrochemical impedance spectrum obtained from 50 randomly selected points on TAPPCo-OH.

| Position | $R_1$<br>( $\Omega$ ) | $CPE_1-T$<br>( $F\text{ cm}^{-2}\text{s}^{n-1}$ ) | $CPE_1-P$<br>(n1) | $R_2(\Omega)$ | $CPE_2-T$<br>( $F\text{ cm}^{-2}\text{s}^{n-1}$ ) | $CPE_2-P$<br>(n2) |
|----------|-----------------------|---------------------------------------------------|-------------------|---------------|---------------------------------------------------|-------------------|
| 1        | 177.1                 | 3.6097E-7                                         | 0.95508           | 1744          | 6.897E-8                                          | 0.784             |
| 2        | 98.95                 | 1.0949E-7                                         | 1                 | 853.3         | 1.5349E-8                                         | 0.831             |
| 3        | 90.92                 | 1.0935E-7                                         | 0.864             | 947.8         | 1.3108E-8                                         | 0.837             |
| 4        | 257.1                 | 2.3138E-6                                         | 0.87959           | 461.7         | 2.7243E-8                                         | 0.441             |
| 5        | 81.4                  | 2.5987E-8                                         | 0.542             | 651.5         | 6.1202E-7                                         | 0.95815           |
| 6        | 209.2                 | 3.8624E-7                                         | 0.94591           | 1748          | 5.6037E-8                                         | 0.713             |
| 7        | 127                   | 5.7888E-8                                         | 0.454             | 594.4         | 9.624E-7                                          | 0.94899           |
| 8        | 140.8                 | 3.9428E-8                                         | 0.486             | 579.6         | 9.8752E-7                                         | 0.94685           |
| 9        | 143.7                 | 4.1558E-8                                         | 1.477             | 577           | 9.6829E-7                                         | 0.94863           |
| 10       | 130.6                 | 3.1657E-8                                         | 0.479             | 571.7         | 6.5319E-7                                         | 0.95336           |
| 11       | 96.73                 | 2.587E-8                                          | 0.524             | 620           | 6.4151E-7                                         | 0.95436           |
| 12       | 95.31                 | 2.7407E-8                                         | 0.524             | 633.7         | 6.2521E-7                                         | 0.95625           |
| 13       | 103.7                 | 3.1205E-8                                         | 0.499             | 609.8         | 6.5774E-7                                         | 0.9525            |
| 14       | 115.8                 | 2.9219E-8                                         | 0.497             | 584.9         | 6.5503E-7                                         | 0.95295           |
| 15       | 168.4                 | 4.9844E-8                                         | 0.409             | 555.5         | 7.1546E-7                                         | 0.94721           |
| 16       | 121.7                 | 2.8107E-8                                         | 0.498             | 574.7         | 6.6911E-7                                         | 0.95138           |
| 17       | 110.5                 | 3.6188E-8                                         | 0.481             | 624.1         | 6.511E-7                                          | 0.95382           |
| 18       | 284.2                 | 7.4462E-7                                         | 0.98464           | 507.4         | 7.0736E-9                                         | 0.607             |
| 19       | 212.9                 | 1.0983E-6                                         | 0.825             | 484.6         | 4.4778E-6                                         | 0.94162           |
| 20       | 24.47                 | 1.9696E-6                                         | 0.803             | 671.2         | 2.9334E-6                                         | 0.97032           |
| 21       | 123.5                 | 1.0837E-6                                         | 0.798             | 578.8         | 3.6255E-6                                         | 0.95883           |
| 22       | 129.2                 | 1.0258E-6                                         | 0.809             | 567.5         | 3.5497E-6                                         | 0.95995           |
| 23       | 155.4                 | 1.0975E-6                                         | 0.781             | 539.6         | 3.7917E-6                                         | 0.95572           |
| 24       | 142.2                 | 1.0648E-6                                         | 0.796             | 551.7         | 3.6578E-6                                         | 0.95803           |
| 25       | 151                   | 1.1988E-6                                         | 0.673             | 543.9         | 3.7785E-6                                         | 0.95615           |



|    |       |           |         |       |           |         |
|----|-------|-----------|---------|-------|-----------|---------|
| 26 | 192.4 | 1.2214E-6 | 0.744   | 501.9 | 4.202E-6  | 0.9495  |
| 27 | 164.7 | 1.103E-6  | 0.778   | 530.2 | 3.8298E-6 | 0.95514 |
| 28 | 124.6 | 1.0057E-6 | 0.814   | 571.7 | 3.521E-6  | 0.96049 |
| 29 | 56.35 | 3.3279E-8 | 0.892   | 439.7 | 3.0625E-7 | 0.706   |
| 30 | 81.08 | 1.1448E-6 | 0.96907 | 144.4 | 1.1073E-8 | 0.894   |
| 31 | 97.6  | 2.8526E-8 | 0.975   | 397   | 3.3087E-7 | 0.99967 |
| 32 | 91.34 | 2.5262E-8 | 0.998   | 403.6 | 3.1736E-7 | 0.801   |
| 33 | 83.31 | 2.4543E-8 | 0.911   | 411.4 | 3.1797E-7 | 0.901   |
| 34 | 148.4 | 1.1397E-7 | 0.944   | 804   | 8.2571E-9 | 0.702   |
| 35 | 44.02 | 2.5464E-7 | 0.884   | 445.1 | 4.0742E-7 | 0.98603 |
| 36 | 42.12 | 2.6018E-7 | 0.885   | 448.5 | 4.0977E-7 | 0.98524 |
| 37 | 37    | 2.2302E-7 | 0.102   | 454.3 | 3.941E-7  | 0.986   |
| 38 | 39.82 | 2.3245E-7 | 0.895   | 451.6 | 3.9307E-7 | 0.98797 |
| 39 | 42.75 | 2.4484E-7 | 0.888   | 450.6 | 4.1655E-7 | 0.98405 |
| 40 | 59.87 | 2.2863E-7 | 0.735   | 992   | 2.9146E-8 | 0.881   |
| 41 | 9.972 | 5.0885E-7 | 0.787   | 475.2 | 2.0018E-7 | 0.944   |
| 42 | 12.43 | 6.5986E-7 | 0.855   | 475.4 | 1.8029E-7 | 0.954   |
| 43 | 16.31 | 2.0638E-6 | 0.94737 | 475.4 | 1.3155E-7 | 0.997   |
| 44 | 43.64 | 2.4404E-7 | 0.792   | 459.7 | 5.3059E-7 | 0.98284 |
| 45 | 38.25 | 2.2998E-7 | 0.702   | 465.2 | 5.3038E-7 | 0.9793  |
| 46 | 40.34 | 2.4897E-7 | 0.793   | 463   | 5.2921E-7 | 0.98117 |
| 47 | 39.85 | 2.4065E-7 | 0.797   | 463.3 | 5.3472E-7 | 0.98026 |
| 48 | 40.28 | 2.2989E-7 | 0.899   | 462.8 | 5.3557E-7 | 0.98059 |
| 49 | 57.85 | 2.2503E-7 | 0.940   | 852   | 2.9847E-8 | 0.985   |
| 50 | 104.6 | 1.1094E-6 | 0.754   | 561.8 | 3.423E-6  | 0.86248 |

\*The equivalent circuit fitting process was conducted by using ZView software to obtain the local charge transfer resistances of TAPPCo-OH. All AFM-EIS measurements were conducted at 25 °C with a relative humidity of 65%. Direct current (dc) bias: 2 V; amplitude of the alternating current (ac) excitation signal: 100 mV; and frequency range: 100 kHz~1 Hz.

**Table S6.** Comparison of the AEMFC performance of various macrocycle-derived electrocatalysts in the literature.

| Catalyst                | Types of Catalysts | Macrocycle   | Cathode loading<br>(mg cm <sup>-2</sup> ) | <i>T</i><br>(°C) | <i>P</i> <sub>max</sub><br>(mW<br>cm <sup>-2</sup> ) | Ref |
|-------------------------|--------------------|--------------|-------------------------------------------|------------------|------------------------------------------------------|-----|
| CoPc/XC-72              | molecular          | CoPc         | 2                                         | 50               | 105                                                  | 2   |
| CoPc/C                  | molecular          | CoPc         | 3                                         | RT               | 12.6                                                 | 3   |
| FePc/MWCNT              | molecular          | FePc         | 0.6                                       | 45               | 60                                                   | 4   |
| CoPc/MWCNT              | molecular          | CoPc         | 0.6                                       | 45               | 100                                                  | 4   |
| CoFeN <sub>x</sub> /C   | pyrolysis          | hemin CoTMPP | 2.5                                       | 60               | 37                                                   | 5   |
| CNT/PC                  | pyrolysis          | FeTPP        | 2                                         | 80               | 380                                                  | 6   |
| FePc/C                  | pyrolysis          | FePc         | 1                                         | 55               | 120                                                  | 7   |
| CS_FePc_450             | pyrolysis          | FePc         | 1                                         | 50               | 160                                                  | 8   |
| FeCo/XC-72              | pyrolysis          | FePc         | 1                                         | 50               | 178                                                  | 9   |
| FeCo/MNT                | pyrolysis          | FePc         | 1                                         |                  | 182                                                  | 10  |
| CDC/CNT                 | pyrolysis          | CoPc         | 0.7 ± 0.15                                | 60               | 473                                                  | 11  |
| FePc-KCB                | molecular          | FePc         | 1                                         | 50               | 108                                                  | 12  |
| NPMC                    | molecular          | CoPc         | 2                                         | 60               | 232                                                  | 13  |
| pyrolysed<br>KB/FePc    | pyrolysis          | FePc         | 2.0 ± 0.2                                 | 60               | 186                                                  | 14  |
| HT800-FeP               | pyrolysis          | FeTPP        | 1.25                                      | 80               | 580                                                  | 15  |
| C@PVI-<br>(DFTPP)Fe-800 | pyrolysis          | FeTPP        | 2                                         | 60               | 104                                                  | 16  |

|                                                 |           |                    |                      |    |                  |    |
|-------------------------------------------------|-----------|--------------------|----------------------|----|------------------|----|
| MWCNT/CoPc                                      | molecular | CoPc               | -                    | RT | 182 <sup>a</sup> | 17 |
| Zn/Fe <sub>SA</sub> -<br>PC/950/NH <sub>3</sub> | pyrolysis | FeTPP <sup>b</sup> | 3                    | 60 | 352              | 18 |
| PF-TMPPCo                                       | molecular | CoTMPP             | 0.9 μg <sub>Co</sub> | 60 | 226              | 19 |

<sup>a</sup>) Performance of an alkaline glucose/O<sub>2</sub> fuel cell with 0.5 M KOH.

<sup>b</sup>) Fe-porphyrin, in the hemoglobin of pig blood.

## References:

1. S. Lin, C. S. Diercks, Y.-B. Zhang, N. Kornienko, E. M. Nichols, Y. Zhao, A. R. Paris, D. Kim, P. Yang, O. M. Yaghi and C. J. Chang, *Science*, 2015, **349**, 1208-1213.
2. J. Guo, H. He, D. Chu and R. Chen, *Electrocatalysis*, 2012, **3**, 252-264.
3. T. Zhu, X. Qing, P. Xu, Y. Song and J. Qiao, *ECS Transactions*, 2015, **66**, 105-110.
4. I. Kruusenberg, L. Matisen, Q. Shah, A. M. Kannan and K. Tammeveski, *International Journal of Hydrogen Energy*, 2012, **37**, 4406-4412.
5. R. Jiang and D. Chu, *Journal of Power Sources*, 2014, **245**, 352-361.
6. Y. J. Sa, D.-J. Seo, J. Woo, J. T. Lim, J. Y. Cheon, S. Y. Yang, J. M. Lee, D. Kang, T. J. Shin, H. S. Shin, H. Y. Jeong, C. S. Kim, M. G. Kim, T.-Y. Kim and S. H. Joo, *Journal of the American Chemical Society*, 2016, **138**, 15046-15056.
7. H. A. Miller, M. Bellini, W. Oberhauser, X. Deng, H. Chen, Q. He, M. Passaponti, M. Innocenti, R. Yang, F. Sun, Z. Jiang and F. Vizza, *Physical Chemistry Chemical Physics*, 2016, **18**, 33142-33151.
8. D. Y. Chung, M. J. Kim, N. Kang, J. M. Yoo, H. Shin, O.-H. Kim and Y.-E. Sung, *Chemistry of Materials*, 2017, **29**, 2890-2898.
9. O. V. Korchagin, V. A. Bogdanovskaya, M. R. Tarasevich, A. V. Kuzov, G. V.

- Zhutaeva, M. V. Radina, V. T. Novikov and V. V. Zharikov, *Catalysis in Industry*, 2016, **8**, 265-273.
10. L. Osmieri, R. Escudero-Cid, A. H. A. Monteverde Videla, P. Ocón and S. Specchia, *Renewable Energy*, 2018, **115**, 226-237.
  11. R. Praats, M. Käärrik, A. Kikas, V. Kisand, J. Aruväli, P. Paiste, M. Merisalu, A. Sarapuu, J. Leis, V. Sammelselg, J. C. Douglin, D. R. Dekel and K. Tammeveski, *Journal of Solid State Electrochemistry*, 2021, **25**, 57-71.
  12. J. Yang, J. Tao, T. Isomura, H. Yanagi, I. Moriguchi and N. Nakashima, *Carbon*, 2019, **145**, 565-571.
  13. M. Mooste, T. Tkesheliadze, J. Kozlova, A. Kikas, V. Kisand, A. Treshchalov, A. Tamm, J. Aruväli, J. H. Zagal, A. M. Kannan and K. Tammeveski, *International Journal of Hydrogen Energy*, 2021, **46**, 4365-4377.
  14. R. Praats, M. Käärrik, A. Kikas, V. Kisand, J. Aruväli, P. Paiste, M. Merisalu, J. Leis, V. Sammelselg, J. H. Zagal, S. Holdcroft, N. Nakashima and K. Tammeveski, *Electrochimica Acta*, 2020, **334**, 135575.
  15. N. Zion, J. C. Douglin, D. A. Cullen, P. Zelenay, D. R. Dekel and L. Elbaz, *Advanced Functional Materials*, 2021, **31**, 2100963.
  16. Y.-M. Zhao, P.-C. Zhang, C. Xu, X.-Y. Zhou, L.-M. Liao, P.-J. Wei, E. Liu, H. Chen, Q. He and J.-G. Liu, *ACS Applied Materials & Interfaces*, 2020, **12**, 17334-17342.
  17. K. Elouarzaki, A. Le Goff, M. Holzinger, J. Thery and S. Cosnier, *Journal of the American Chemical Society*, 2012, **134**, 14078-14085.
  18. H. S. Kim, J. Lee, J.-H. Jang, H. Jin, V. K. Paidi, S.-H. Lee, K.-S. Lee, P. Kim and S. J. Yoo, *Applied Surface Science*, 2021, **563**, 150208.
  19. R. Ren, X. Wang, H. Chen, H. A. Miller, I. Salam, J. R. Varcoe, L. Wu, Y. Chen, H.-G. Liao, E. Liu, F. Bartoli, F. Vizza, Q. Jia and Q. He, *Angewandte Chemie International Edition*, 2021, **60**, 4049-4054.
